1 Challenges in estimating heritability of phase polyphenism: insights from measured and simulated data  
2 in the desert locust.

3

4 Authors:

5 H  l  ne Jourdan-Pineau<sup>1,2</sup>, Benjamin P  lissie<sup>1,3</sup>, Elodie Chapuis<sup>2,4</sup>, Floriane Chardonnet<sup>1</sup>, Christine  
6 Pag  s<sup>5</sup>, Antoine Foucart<sup>1</sup>, Laurence Blondin<sup>5</sup>, Cyril Piou<sup>1,6,7=</sup>, Marie-Pierre Chapuis<sup>1=</sup>

7

8 Affiliations:

9 1. CIRAD, UMR CBGP, F-34398 Montpellier, France

10 2. CIRAD, UMR PVBMT, F-97410 Saint-Pierre, La R  union, France

11 3. University of Wisconsin Madison, Department of Entomology, Madison, USA

12 4. IRD, UMR IPME Montpellier, France

13 5. CIRAD, UPR B-AMR, F-34398, Montpellier, France

14 6. Centre National de Lutte Antiacridienne, Agadir, Morocco

15 7. Universit   Ibn Zohr, Agadir, Morocco

16 = equal contribution

17

18 Corresponding author

19 H  l  ne Jourdan-Pineau : [helene.jourdan@cirad.fr](mailto:helene.jourdan@cirad.fr)

20

21 Keywords: quantitative genetics, simulations, maternal effects, locusts, phase polyphenism, pedigree-  
22 free method.

23

24 Running title: Heritability and maternal effect in locust phase polyphenism

25

26 **Abstract:**

27 Quantitative genetics experiments aim at understanding and predicting the evolution of phenotypic  
28 traits. Running such experiments often bring the same questions: Should I bother with maternal  
29 effects? Could I estimate those effects? What is the best crossing scheme to obtain reliable estimates?  
30 Can I use molecular markers to spare time in the complex task of keeping track of the experimental  
31 pedigree?

32 We explored those practical issues in the desert locust, *Schistocerca gregaria* using morphologic and  
33 coloration traits, known to be influenced by maternal effects. We ran quantitative genetic analyses  
34 with an experimental dataset and used simulations to explore i) the efficiency of animal models to  
35 accurately estimate both heritability and maternal effects, ii) the influence of crossing schemes on the  
36 precision of estimates and iii) the performance of a marker-based method compared to the pedigree-  
37 based method.

38 The simulations indicated that maternal effects deeply affect heritability estimates and very large  
39 datasets are required to properly distinguish and estimate maternal effects and heritabilities. In  
40 particular, ignoring maternal effects in the animal model resulted in overestimation of heritabilities  
41 and a high rate of false positives whereas models specifying maternal variance suffer from lack of  
42 power. Maternal effects can be estimated more precisely than heritabilities but with low power. To  
43 obtain better estimates, bigger datasets are required and, in the presence of maternal effects, increasing  
44 the number of families over the number of offspring per families is recommended. Our simulations  
45 also showed that, in the desert locust, using relatedness based on available microsatellite markers may  
46 allow reasonably reliable estimates while rearing locusts in group.

47 In the light of the simulation results, our experimental dataset suggested that maternal effects affected  
48 various phase traits. However the statistical limitations, revealed by the simulation approach, didn't  
49 allow precise variance estimates. We stressed out that doing simulations is a useful step to design an  
50 experiment in quantitative genetics and interpret the outputs of the statistical models.

## 51 **Introduction**

52 Trait evolution directly depends on the phenotypic variation transmitted across generations by genetic  
53 inheritance, parental effect or even cultural and ecological inheritance (Danchin, Charmantier,  
54 Champagne, *et al.*, 2011). Therefore, predicting the evolutionary potential of a phenotypic trait  
55 requires quantifying the amount of phenotypic variation due to genetic, maternal (or more generally  
56 parental) and environmental effects, which is the general objective of quantitative genetics (Lynch &  
57 Walsh, 1998). Quantitative genetics experiments rely on the phenotypic resemblance of related  
58 individuals and are therefore based on controlled crossings and phenotypic measurements of  
59 individuals of known pedigree. Running a quantitative genetics experiment for the first time on a new  
60 model species can be challenging and requires a careful consideration of the crossing scheme, pedigree  
61 inference and statistical model.

62 First, heritability is estimated by measuring phenotypes of individuals of known degrees of  
63 relatedness. To obtain such data, it is necessary to use a population with a pedigree data ranging over  
64 several generations or to design an experiment with specific relatedness classes. Thus, in the  
65 laboratory, controlled crosses are required and the chosen crossing scheme has a real impact on the  
66 nature and precision of the estimates. For example, full-sib design only gives an estimate of the broad-  
67 sense heritability ( $H^2$ ) that contains all the genetic variance in the form of additive, dominance and  
68 epistatic allele effects (divided by the phenotypic variance) whereas a half-sib/full-sib design gives an  
69 estimate of the narrow-sense heritability ( $h^2$ ) containing only the additive effect of the genetic variance  
70 (Lynch & Walsh, 1998). Since response to selection depends only on the additive effects of genes,  $h^2$   
71 is the privileged estimated parameter (Visscher, Hill & Wray, 2008). In addition, quantitative genetic  
72 studies require keeping track of individual's identity over the whole experiment either by rearing each  
73 individual separately or by marking them from birth to phenotypic measurement. This may be either  
74 very time and space consuming or technically challenging, in some species, and creates a practical  
75 limit to the obtainment of an adequate sample size. Therefore, for a given sample size, it seems crucial  
76 to optimize the crossing scheme (paternal or maternal half-sibs, number of families and offspring per  
77 family...) towards more statistical power, which depends on which components of the phenotypic  
78 variance are estimated (Lynch & Walsh, 1998).

79 Second, pedigree-free methods can release the constraints of keeping track of each phenotyped  
80 individual during the whole experiment. From a dataset of genotypes, one can either compute pairwise  
81 values of genetic relatedness or reconstruct the whole pedigree to incorporate in quantitative genetic  
82 models. These methods have been successfully used for quantitative genetic analyses in natural  
83 populations where pedigree information is generally not available except for long-term studies. In this  
84 field context, many simulation studies have explored their potential and limits, including quality and  
85 quantity of molecular markers and performance of relatedness coefficients (Visscher, Hill & Wray,  
86 2008; Gay, Siol & Ronfort, 2013). Overall, performance of these methods rely mainly on the number  
87 and quality of molecular markers (Wang, 2006) and on relatedness composition of the sampled

88 population (Csilléry, Johnson, Beraldi, *et al.*, 2006; DiBattista, Feldheim, Garant, *et al.*, 2009).  
89 Laboratory populations are closed systems where the relatedness composition can be optimized either  
90 by a total control of mating or with free mating of a chosen set of breeders. This latter option is  
91 particularly useful to maximize the probability of obtaining successful crosses when mating among  
92 designated individuals is not guaranteed, for example when mate choice is strong.

93 Third, the inheritance of various traits may be very complex. Since heritability estimates are  
94 based on the phenotypic resemblance of related individuals, they can be artificially inflated by  
95 resemblance caused by maternal effects (Kruuk & Hadfield, 2007). Using animal models, which are  
96 linear mixed models with the relatedness matrix as random factor, Wilson *et al.* (2005) estimated that  
97 maternal effects accounted for 21% of the total phenotypic variation in the birth weight of Soay sheep,  
98 compared to 12% for the heritability itself. Maternal effects can further be distinguished between  
99 environmental effects experienced by the mother, genetic variation among mothers and finally  
100 genotype-by-environment interactions. Accordingly, in Soay sheep, the maternal environmental  
101 effects and the maternal genetic effects represent respectively 11% and 12% of the phenotypic  
102 variation of birth weight (Wilson, Coltman, Pemberton, *et al.*, 2005)). To our knowledge, few studies  
103 have precisely quantified how heritability estimates can be biased by the presence of non-estimated  
104 maternal effects and even fewer have explored the precision of maternal effect estimates (but see  
105 Kruuk & Hadfield, 2007; Holand & Steinsland, 2016; De Villemereuil, Gimenez & Doligez, 2013).  
106 Even if the main motivation when considering maternal effect is to control this potential statistical  
107 nuisance in heritability estimates, maternal effects are also of considerable evolutionary interest to  
108 understand the evolution of traits. For example, theoretical models showed that maternal genetic  
109 effects represent an additional source of genetic variation which can affect the rate of trait evolution  
110 (Kirkpatrick & Lande, 1989).

111 In view of these considerations, and despite a vibrant field, some important methodological  
112 challenges still remain to be solved prior to address the quantitative genetics of a new model species:  
113 Can I omit maternal effects? What is the best statistical model to estimate the genetic basis of  
114 phenotypic traits? What are the sample size and structure of data required? Can pedigree-free  
115 approaches alleviate some of the technical constraints in quantitative genetics designs? We here  
116 addressed these four questions in the case study of the desert locust.

117 To this aim, we ran quantitative genetic analyses on an experimental dataset of body size,  
118 shape and color measured in late stages of a laboratory nature-derived population of the desert locust,  
119 *Schistocerca gregaria*, reared under controlled isolation conditions. We also used computer  
120 simulations to assess, along varying levels of heritability and maternal effects, the performance of two  
121 statistical animal models under various crossing schemes and relatedness inferences, derived from the  
122 experimental design. We finally interpreted phase trait data in the desert locust, illustrated how  
123 cautious one should be when interpreting this kind of data, and suggested directions for future research  
124 investigations.

125           Locusts are renowned for their nymphal marching bands and winged adult swarms that  
126 threaten food security in large areas (Sword, Lecoq & Simpson, 2010). This striking gregarious  
127 behavior is one aspect of the locust phase polyphenism, an extreme case of phenotypic plasticity. At  
128 low population densities, individuals tend towards a solitary phenotype. On the contrary, at  
129 critically high population densities, locusts become gregarious. This fascinating phenotypic plasticity  
130 involves many traits (often called "phase traits"), amongst which behavior, morphometry, coloration,  
131 physiology and life-history traits (Pener & Simpson, 2009). The substantial variation in phase traits  
132 observed between natural populations, reared under standardized laboratory conditions might indicate  
133 that these traits have an evolutionary potential (Nolte, 1966; Chapuis, Estoup, Augé-Sabatier, *et al.*,  
134 2008; Yerushalmi, Tauber & Pener, 2001; Botha, 1967; Schmidt & Albütz, 1996). However, the  
135 genetic contribution to phenotypic variance of key phase traits has never been assessed in locusts; and  
136 their potential to respond to selection is unknown. In this attempt, it would be informative to carry  
137 quantitative genetics experiments on both isolated and crowd-reared locusts, as phase polyphenism is a  
138 response to density. However, marking locusts throughout their development and successive molts is  
139 not feasible (Gangwere, Chavin & Evans, 1964), which makes methods based on molecular markers  
140 (*i.e.* pedigree-free methods) a promising alternative to estimate variance components of phase traits in  
141 crowd-reared locusts. Over and above that, for more than 50 years it has been known that parental  
142 rearing density also affect phase traits such as coloration and morphometry of hatchlings. Crowded  
143 parents tend to produce black and larger-headed hatchlings (and inversely for isolated parents),  
144 irrespective of the population density experienced by offspring during their development (see Table 1).  
145 Therefore, estimating maternal effects is of high relevance to the understanding of evolution of phase  
146 polyphenism.

147

## 148 **Material and methods**

### 149 *Quantitative genetics animal models*

150 All quantitative genetics analyses were based on half-sib full-sib designs. We used two different kinds  
151 of animal models: Model 1 in which maternal effects are not specified (*i.e.* a naive model) and Model  
152 2 which includes maternal effects (*i.e.* an informed model similar to equation 2 in De Villemereuil,  
153 Gimenez & Doligez, 2013).

154 **Model 1** only specifies a genetic effect as a random pedigree effect:

$$155 Y_i = \mu + A_i + \varepsilon_i$$

156 where  $Y_i$  is the phenotype of individual  $i$ ,  $\mu$  is the population mean,  $A_i$  is the individual's additive  
157 genetic value, and  $\varepsilon_i$  is the random residual value. Hence, the total phenotypic variance ( $V_P$ ) was  
158 portioned into a variance attributed to additive genetic effects ( $V_A$ ) and a residual variance ( $V_R$ ) such  
159 that  $V_P = V_A + V_R$

160 **Model 2** specifies, in addition to pedigree, a random mother effect  $M_{ki}$  (environment of the mother  $k$   
161 on individual  $i$ ):

162  $Y_{i,k} = \mu + A_i + M_{ki} + \varepsilon_i$

163 In this case,  $V_P = V_A + V_M + V_R$ . From Model 1 and Model 2, we computed the narrow-sense  
164 heritability  $h^2 = V_A / V_P$  and similarly, the maternal effect  $m^2 = V_M / V_P$ . This maternal effect includes  
165 maternal environmental effects, maternal genetic effects as well the interactions between genes and the  
166 environment (McAdam, Garant & Wilson, 2014). The estimation of the maternal genetic component  
167 would have required that individual mothers have female relatives in the dataset which is not the case  
168 in the studied half-sib/full-sib designs.

169 The random pedigree effect was computed from either a pedigree (pedigree-based method) or  
170 the relatedness between pairs of genotyped individuals (pedigree-free method). Additive genetic and  
171 maternal estimates were obtained by running univariate animal models using **Asreml-R** (Butler,  
172 Cullis, Gilmour, *et al.*, 2007). Standard errors for  $h^2$  and  $m^2$  were obtained by the delta method (Lynch  
173 & Walsh, 1998). P-values for the maternal effect were obtained by likelihood ratio tests (LRTs)  
174 between Model 1 and Model 2 whereas p-values for the pedigree effect were obtained by LRTs  
175 between Model 1 or Model 2 and the same model without the random pedigree effect (Wilson, Réale,  
176 Clements, *et al.*, 2010).

177

#### 178 *Empirical data*

179 **Experimental design.** Our laboratory population derived from fertilized desert locust females  
180 collected in the field (see Pelissie, Piou, Jourdan-Pineau, *et al.*, 2016 for further details). Locusts were  
181 maintained under isolated conditions for four subsequent generations. The fourth generation consisted  
182 in half-sib and full-sib families. The crossing scheme was 8 sires, mated to 2 to 3 females yielding to a  
183 total of 15 maternal families. The use of paternal half-sibs was dictated by our ambition to estimate  
184 maternal effects but also by the presence of multiple paternities in the desert locust (Seidelmann &  
185 Ferenz, 2002). For each maternal family, approximately 13 offspring were evenly distributed, right  
186 after hatching, between two temperature treatments: 28°C or 34°C. Temperature is known to affect  
187 phase traits (see Table 1) and may exert developmental constraints, susceptible to reveal genetic  
188 variation (Charmantier & Garant, 2005). A total of 486 hatchlings were selected and kept until adult  
189 molt. Larval mortality reduced the final sample size to 212 adult offspring. Known maternal effects  
190 were largely controlled with a homogenization of density, temperature and other main environmental  
191 drivers (e.g. humidity, food given *ad libitum*) (see Table 1 and Pelissie, Piou, Jourdan-Pineau, *et al.*,  
192 2016 for further details on rearing isolation conditions).

193

194 **Phenotypic measurements.** We considered two commonly used sets of phase characteristics: fifth-  
195 instar larval coloration and adult morphometry (Pener & Simpson, 2009). Color differences between  
196 gregarious and solitary desert locust larvae are the most noticeable phase change ((Nickerson &  
197 others, 1956; Pener & Simpson, 2009). Population density induces modification in the black patterning  
198 and in the green-brown coloration: solitary late juveniles are typically green whereas gregarious late

199 juveniles display a beige or brown background color with black pigmentation (Table 1 and references  
200 within). This is because all larvae have an integument of a beige or brown color, and either a black  
201 pigment, melanin, is deposited after ecdysis in the cuticle of the integument of gregarious insects, or a  
202 green pigment is produced from a yellow carotenoid and a blue bile pigment in the haemolymph of the  
203 integument of solitary insects (Nolte, 1965). Thus, we measured the level of brightness directly  
204 correlated negatively to the level of black pigmentation and the percentage of green color which is a  
205 direct estimate of the green-brown polyphenism of an individual (see section 1.1 in the Appendix for  
206 details on methods and illustrations).

207 In adult, five morphometric ratios were considered : (i) the ratio of the length of the fore wing  
208 on the length of the hind femur (E/F) and (ii) the ratio of the length of the hind femur on the maximum  
209 width of the head (F/C), widely used for characterizing phase state in the field (Stower, Davies &  
210 Jones, 1960); (iii) the ratio of the length of the hind femur on the width of the vertex between eyes  
211 (F/V) and (iv) the ratio of the vertical diameter of eyes on the width of the vertex between eyes (O/V),  
212 considered as reliable indicators of phase change (Dirsh, 1953) (see section 1.2 in the Appendix for  
213 details on methods and illustrations). The values of these ratios changes toward gregarious adults with  
214 longer wings, larger heads and shorter eyes (Table 1 and references within).

215 In addition to larval coloration and adult morphometry, we considered two proxies of body  
216 size that varies with phase but in a sex-dependent manner. We measured the maximal larval weight  
217 (Pélessié et al. 2016) in the fifth-instar larvae and the length of the hind femur (F) in adults (with a low  
218 measurement error; e.g. Chapuis, Foucart, Plantamp, *et al.*, 2017). In adults of *S. gregaria*, solitary  
219 females are larger than conspecific gregarious females, but solitary males are slightly smaller than  
220 gregarious ones (Table 1 and references within). Therefore, the difference in body size between the  
221 females and the males is smaller in the gregarious than in the solitary phase.

222 For each adult, we determined its sex to control for sexual dimorphism in body size and shape  
223 (Dirsh, 1953). We also recorded the number of larval molts, since between the third and fourth instars,  
224 desert locusts can undergo an extramolt that influences adult body size, E/F and F/C ratios (Pélessié,  
225 Piou, Jourdan-Pineau, *et al.*, 2016; Maeno, Gotoh & Tanaka, 2004). We summarized the larval color,  
226 adult body shape and size variables by extra-molting, sex, temperature in the section 1.3 in the  
227 Appendix. Details on maternal effects and functions of these density-mediated changes can be found  
228 in Table 1.

229  
230 **Quantitative genetics analyses.** In order to remove non-genetic variation associated with known  
231 effects, we fitted sex, temperature, extramolting and their interactions as fixed effects in animal  
232 models (see section 1.4 in the Appendix). For each trait, we estimated the genetic component of  
233 phenotypic variance by running both Model 1 and Model 2. The random pedigree effect was estimated  
234 using the inverse of the additive genetic relationship matrix (A matrix) computed from a pedigree  
235 spanning 4 generations. Note that we obtained very similar results (data not shown) when using only

236 the parental and offspring generations in the pedigree (*i.e.* 2 instead of 4 generations), indicating that  
237 its level of inbreeding was low (Lynch & Walsh, 1998). Finally, we also ran Model 1 replacing the  
238 pedigree by a marker-based relatedness matrix based on the genotyping of 96 offspring from the  
239 original dataset (all reared at 34°C) with a set of 16 microsatellite markers (SgM51, SgM92, SgM41,  
240 SgM74, SgM66, SgM96, SgM87, SgM88, SgM86, SgR36, DL09, SgR53, DL13, diEST-11, diEST-8  
241 and diEST-40, Yassin et al. 2006, Kaatz et al. 2007, Blondin et al. 2013). Those last results were  
242 compared with analyses run on the same individuals but using the known pedigree instead of the  
243 pairwise relatedness values. To allow a complete comparison, we also ran Model 1 on the subset of  
244 individuals reared either at 28°C or at 34°C. However, the interaction between genotype and  
245 environment will not be treated further in this study.

246

247

248 *Simulated data*

249 **Simulation algorithm.** The simulated phenotypic values were computed using Model 2 (which  
250 includes a maternal effect) and following Morrissey *et al.*, (2007):  $\mu$ , the mean phenotype in the  
251 population, was arbitrarily set to 0;  $A_i$ , the breeding value of the individual  $i$ , was normally distributed  
252 assuming additive genetic variance  $V_A$ ;  $M_k$ , the maternal effect was normally distributed assuming  
253 variance  $V_M$ , and  $\epsilon_i$ , the residual variation, was normally distributed with variance  $V_R$ . To compute the  
254 breeding values  $A_i$  according to the simulated pedigree and  $V_A$ , we used the **rbv** function from the R  
255 package **MCMCglmm** (Hadfield, 2010), which applies a Mendelian random deviation for each  
256 offspring.

257 **Simulation of phenotypes.** In every investigated scenario, we allowed the level of the heritability  $h^2$   
258 and of the maternal effect  $m^2$  to vary among 4 fixed values: 0 (absence), 0.1 (low level), 0.3 (moderate  
259 level) and 0.5 (high level). Those values are realistic in regard to previous studies in insects and, more  
260 generally, in other animals (Mousseau & Roff, 1987; Houle, 1992; Visscher, Hill & Wray, 2008 for  $h^2$   
261 values; Räsänen & Kruuk, 2007; Wilson, Coltman, Pemberton, *et al.*, 2005 for  $m^2$  values). They were  
262 obtained by setting the total phenotypic variance  $V_P$  to a fixed value while allowing  $V_A$ ,  $V_M$  and  $V_R$  to  
263 vary. We generated every possible combination of  $h^2$  and  $m^2$ , thus leading to the comparison of 16  
264 different phenotypic scenarios.

265 **Simulation based on our experimental design.** For each combination of  $h^2$  and  $m^2$ , we simulated  
266 1,000 phenotypic datasets based on our experimental design, *i.e.* with exactly the same pedigree and  
267 the same subset of phenotyped individuals (Morrissey, Wilson, Pemberton, *et al.*, 2007).

268 **Simulation based on refined crossing schemes.** We tested the sensitivity of estimation to various  
269 paternal half-sib/full-sib designs (see section 2.1 in the Appendix for parameter values of each test  
270 crossing scheme). We first simulated a design very close to our actual experimental design: it resulted  
271 in a crossing scheme of 8 sires, 2 dams by sires and 13 offspring per dams, for a total of 208 offspring  
272 (CS3). We then used this half-sib/full-sib design as a reference to derive 13 more crossing schemes



273 with varying numbers of sires (S), dams by sire (D), and of offspring (O) per family ( $F = D \times S$ ), for a  
274 total sample size (N) of 208 offspring. This set of crossing schemes allowed us to compare the distinct  
275 effects of family size and the crossing scheme on our ability to accurately detect  $h^2$  and  $m^2$ . Finally, we  
276 tested for the effect of doubling the total sampling size by simulating a 15<sup>th</sup> dataset involving 416  
277 offspring (CS15). This crossing scheme was derived from one of the best performing crossing scheme  
278 (see below) and consisted of 8 sires, 13 dams by sire and 4 offspring per dam instead of 2 (CS12). For  
279 each crossing scheme and for each combination of  $h^2$  and  $m^2$ , we simulated 400 phenotypic datasets.

280 **Pedigree-free approaches.** First, we ran the same type of simulations but replacing pedigree-based  
281 relatedness by marker-based relatedness, on 2 crossing schemes: our experimental design (as if the  
282 212 individuals had been genotyped) and the crossing scheme CS15 with 416 individuals. In each  
283 design, we tested 2 realistic sets of microsatellite markers: 16 (the set used for genotyping in our  
284 experimental design), or 29, that is the maximum number of markers available for the desert locust  
285 (Kaatz, Ferenz, Langer, *et al.*, 2007; Yassin, Heist & Ibrahim, 2006; Blondin, Badisco, Pagès, *et al.*,  
286 2013). Pairwise relatedness based on microsatellite markers were computed using the coefficient  
287 introduced by Loiselle *et al.* (1995). We used the R package **pedantics** to simulate molecular  
288 genotypes based on a selection of markers and a given pedigree (Morrissey & Wilson, 2010) and the R  
289 package **Ecogenetics** to compute Loiselle relatedness coefficients based on the desert locust  
290 microsatellite markers (Roser, Vilardi, Saidman, *et al.*, 2015). The analyses were processed with  
291 Model 1 only since maternal identity could not be inferred from molecular relatedness. We explored 4  
292 scenarios with respective  $h^2$  values of 0, 0.1, 0.3 and 0.5 and simulated 400 relatedness matrices (based  
293 on Loiselle coefficients) and phenotypic datasets per scenario.

294 **Performances of simulated datasets.** We evaluated the performance of the animal models, crossing  
295 schemes and pedigree-free methods using four criteria applied to all simulations within one scenario:  
296 i) the mean values of  $h^2$  and  $m^2$  estimates, ii) the 95% confidence intervals; which inform on bias and  
297 dispersion, respectively, iii) the average of the root mean square error (RMSE) between simulated and  
298 estimated values (Bolker, 2008) and iv) the power to detect either pedigree or maternal effect  
299 computed as the percentage of simulated datasets that gave a significant pedigree effect or maternal  
300 effect (when included). To compare the simulated crossing schemes, we tested the influence of dam-  
301 to-sire ratio (D:S), of the number of offspring per family (O) and of their interaction, on the RMSE (of  
302  $h^2$  and  $m^2$ ) and on the statistical powers to detect pedigree and maternal effect), using linear models  
303 with the levels of  $h^2$  and  $m^2$  (respectively) as covariate.

304

## 305 **Results**

### 306 *Empirical dataset on phase traits of the desert locust*

307 Heritability and maternal effects estimates computed from the whole desert locust dataset are given in  
308 Table 2. In the naïve model (Model 1), body size traits, pronotum coloration traits, and the ratio of the  
309 femur length over the head width had significant  $h^2$  estimates ( $0.71 \geq h^2 \geq 0.18$ ). Interestingly, the

310 same five traits were still significantly heritable when considering insects reared at the low  
311 temperature of 28°C. Conversely, none of the heritabilities turned significant at the high temperature  
312 of 34°C (see section 1.5 in the Appendix).

313 Adding a maternal effect in the statistical model (*i.e.* the informed model, Model 2) strongly  
314 lowered additive genetic variances for most traits, due to large maternal variances ( $V_m$ ) compared to  
315 additive genetic variances. Nevertheless, none of these maternal effects were found to be significant  
316 ( $p$ -values  $\geq 0.11$ ), due to large standard errors of  $m^2$  estimates ( $SE \geq 0.05$ ). Conversely, the  
317 morphometric ratios E/F and O/V showed almost-null  $V_m$  and null  $m^2$  values, leading to the same  
318 values as in Model 1 for  $V_A$ ,  $h^2$  and  $SE(h^2)$ , although associated  $p$ -values were largely increased in  
319 Model 2.

320 Using the pedigree-free method with 16 microsatellite markers and on a subset of individuals  
321 measured at 34°C, we obtained variance and heritability estimates in the same order of magnitude as  
322 when analyzing the same subset using the real pedigree for most traits. However, E/F has larger  
323 additive genetic variance with the pedigree-free method than when using the pedigree (Table 3). With  
324 both methods, brightness was found significantly heritable (Table 3).

325

#### 326 *Simulation based on our experimental design*

327 In the absence of simulated maternal effects ( $m^2 = 0$ ; Fig. 1 first column), Model 1 performed better  
328 than Model 2 in estimating heritability. First,  $h^2$  estimates were biased downward only in Model 2 (e.g.  
329 a simulated  $h^2$  of 0.3 was estimated in average at 0.20). Second, both statistical models led to large  
330 dispersion in  $h^2$  estimates that increased with simulated  $h^2$  values, and RMSE values were close to  $h^2$   
331 values (e.g. 0.16 for a simulated  $h^2$  of 0.3 in Model 1). Finally, in Model 1, the power to detect a true  
332 pedigree effect was low for low simulated  $h^2$  values (*i.e.* 30.5% for  $h^2 = 0.1$ ), satisfying for  
333 intermediate simulated  $h^2$  values (*i.e.* 82% for  $h^2 = 0.3$ ) and very high for the highest simulated  $h^2$   
334 values (*i.e.* 95.9% for  $h^2 = 0.5$ ). Conversely, in Model 2, the statistical power stayed very low even  
335 when simulated heritability was the highest (*i.e.* 11.2% for  $h^2 = 0.5$ ).

336 In the presence of simulated maternal effects, the  $h^2$  estimates became highly biased upward  
337 with Model 1, reaching values of 1 for  $m^2 = 0.5$  whatever the simulated  $h^2$ , or for  $m^2 = 0.3$  when  
338 simulated  $h^2$  was high ( $\geq 0.3$ ) (Fig. 1, right upper panels). Accordingly, Model 1 generated significant  
339 pedigree effects in all simulations for maternal effects  $\geq 0.3$ , even when the simulated heritability was  
340 null (*i.e.* 100% of false positives). Adding a simulated maternal effect in Model 2 induced a downward  
341 bias of the same magnitude but a greater dispersion of the  $h^2$  estimates, with even 95% CI covering the  
342 whole space when maternal effects were large (*i.e.*  $\geq 0.3$ ) (Fig. 1, right lower panels). The RMSE  
343 values for  $h^2$  estimates were however lower with Model 2 than with Model 1. In Model 2, the power  
344 for detecting a pedigree effect of any level was always very low ( $< 5\%$ ).

345 Estimation of a maternal effect with Model 2 showed a downward bias that decreased with  
346 higher simulated  $h^2$  (e.g. a simulated  $m^2$  of 0.3 was estimated in average in the range of 0.2-0.29; Fig.

347 2). Whatever the simulated  $h^2$  values, there was a large dispersion in estimates increasing with  
348 simulated  $m^2$  values. As for heritability estimates, RMSE values for maternal effects increased with  
349 the simulated  $m^2$  (0.17 to 0.20 for a simulated  $m^2$  of 0.3). The power to detect a maternal effect was  
350 low and just reached 50% when maternal effect was 0.5.

351

### 352 *Simulation datasets on the varying crossing schemes*

353 In the absence of maternal effects, the use of Model 1 on crossing schemes with more sires than dams  
354 by sires ( $D:S < 1$ ) yielded slightly smaller RMSEs for  $h^2$  estimates ( $(F_{1,55}=9.52, p\text{-value}=0.003)$  but did  
355 not improve the statistical power to detect a pedigree effect, (Fig. 3a). Conversely, a higher number of  
356 offspring per females (*i.e.* fewer families) did not impact RMSE values but yielded greater power for  
357 detecting a pedigree effect ( $F_{1,55}=9.54, p\text{-value}=0.003$ , Fig. 3b). In presence of maternal effects,  
358 refining crossing schemes by the number ratios of dams on sires or of offspring on families did not  
359 help sorting out the upward bias and over power in heritability estimation of Model 1.

360 Using Model 2 (with maternal effects  $\geq 0$ ), the power for detecting a pedigree effect was  
361 significantly greater in designs with  $D:S > 1$  ( $F_{1,223}=11.56, p\text{-value}<10^{-3}$ , Fig. 3a). RMSE for maternal  
362 effect estimates ( $m^2$ ) were significantly lowered with such crossing schemes ( $F_{1,223}=6.89, p\text{-value}=0.001$ ),  
363 but the power to detect them remained unaffected. Finally, increasing the number of  
364 families instead of offspring per female significantly increased both the power to detect heritability  
365 and maternal effect ( $F_{1,239}=100.17, p\text{-value}<10^{-3}$  and  $F_1=105.15, p\text{-value}<10^{-3}$ , respectively) while  
366 decreasing RMSE values ( $F_{1,239}=52.33, p\text{-value}<10^{-3}$ , and  $F_{1,239}=57.67, p\text{-value}<10^{-3}$  respectively, Fig.  
367 3b). Accordingly, one of the crossing schemes with the highest global performance in an informed  
368 model was composed of 8 families with 13 dams per sire and 2 offspring (CS12). This crossing  
369 scheme did not improve the small downward bias on  $h^2$  estimation but markedly decreased the  
370 variance in  $h^2$  estimation (*i.e.* 95% CI and RMSE criteria; see section 2.2 in the Appendix for details).  
371 This resulted in an increased power to detect a pedigree effect that could reach 62-74% for large  
372 maternal effects (*i.e.*  $m^2=0.5$ ) whereas it reached a limit of 11% under the crossing scheme mimicking  
373 our experimental design (CS3; Figure 1). As for maternal effects, this crossing scheme of a relative  
374 high numbers of families and of dams per sire allowed an unbiased estimation with a lowered variance  
375 (RMSE values  $\leq 0.12$  and narrower 95% CI) and an increased statistical power reaching 100% in the  
376 best case ( $m^2=0.5$ ).

377 Finally, we explored the gain in performance for a sample of a larger size. To this aim, we  
378 selected the crossing scheme CS12 with a high global performance, doubled the number of offspring  
379 within families ( $N = 416$ ) and ran additional simulations with this new crossing scheme (CS15). In the  
380 absence of a maternal effect, Model 1 showed good performances, with a slight increase in power to  
381 detect a pedigree effect and a slight decrease in RMSE values (Fig. 4, left upper panel). The  
382 performance of Model 2 in  $h^2$  estimation was increased, with a reduced downward bias and augmented  
383 power in  $h^2$  estimates, but still lower than in Model 1 (Fig. 4, left bottom panel). In the presence of

384 maternal effects, the performance of Model 1 to estimate the pedigree effect was still poor in line with  
385 previous simulations, without improvements of the strong overestimation and high number of false  
386 positives (Fig. 4, upper right panels). With Model 2,  $h^2$  estimation was not biased downward anymore  
387 with this large sample size design and the power to detect a pedigree effect considerably increased,  
388 though still low ( $\leq 72\%$ ) when maternal effects were high ( $\geq 0.3$ ; Fig. 4, lower right panels). In  
389 comparison with the same type of crossing scheme with twice lower sample size, maternal effects  
390 were estimated more precisely (narrower 95% CI) and with greater power (Fig. 5).

391

#### 392 *Simulation datasets with pedigree-free method*

393 Overall, simulations based on our experimental dataset and on the large crossing scheme (CS15)  
394 showed very similar outcomes (Fig. 6). Using relatedness values computed from genotypes of 16 or 29  
395 microsatellite markers yielded very close performances of  $h^2$  estimation, both in terms of RMSE and  
396 power to detect a pedigree effect. Pedigree-free methods performed reasonably well when compared to  
397 using the full pedigree, showing only a slight 2-10% decrease in power, and a 30% increase in RMSE  
398 in the worst case, i.e. the smallest number of microsatellite markers and a high simulated heritability  
399 ( $h^2 = 0.5$ ). This increase in RMSE was explained by a downward bias in  $h^2$  estimates when using  
400 microsatellite markers compared to using the full pedigree (results not shown).

401

#### 402 **Discussion**

403 Statistical limitations in quantitative genetics studies may compromise to draw firm conclusions about  
404 the genetic basis of the traits under study. The present study used computer simulations to examine the  
405 validity and limits of a standard quantitative genetics experiment, in the context of the density-  
406 dependent phase polyphenism, partly transmitted by maternal effects. We looked at the performance of  
407 animal models in disentangling heritability and maternal effects, and how these performances were  
408 affected by the crossing scheme and the relatedness inference. We interpreted phase trait data in the  
409 desert locust in the light of the simulation results and recommended methodological directions for  
410 future research.

411

#### 412 *Performance of a naïve model (Model 1)*

413 In absence of maternal effects, a naïve model (without any specified maternal effect) outperformed an  
414 informed model (Model 2) in heritability estimation, whatever the type and sampling size of crossing  
415 schemes. Our experimental half-sib/full-sib design led to unbiased estimation with the naïve model as  
416 well as a satisfying power, except for low levels of heritability (e.g.  $h^2=0.1$ ) (Fig. 1). In such situation,  
417 crossing schemes with more sires than dams by sires showed the greatest performances to estimate  
418 heritability (Fig. 3). This result echoes the classical calculation of  $h^2$  in half-sib/full sib design analyses  
419 where  $h^2$  is directly derived from the sire variance; therefore more sires should give greater precision  
420 to  $h^2$  (Lynch & Walsh, 1998). This kind of crossing scheme might also be advantageous in species

421 where it is easier to use a large number of males mated to few females each. This is the case for the  
422 desert locust, whose mating can last several hours to several days, strongly decreasing the potential  
423 number of female partners per males (Uvarov, 1966). In addition, in the naive model, the power to  
424 detect pedigree effect was greater with a larger number of offspring per female but this was not  
425 accompanied by any improvement in RMSE values (Fig. 3). In conclusion, a crossing scheme close to  
426 the one we used for the acquisition of experimental data on phase traits of the desert locust is relevant  
427 for the estimation of heritability in absence of a maternal effect (see the summary guideline in Table  
428 4). A standard sample size should provide robust information on moderate and high heritability traits,  
429 even if larger effort would improve the power and precision of estimation.

430 However, in the naive model, the presence of a maternal effect strongly inflated heritability  
431 estimates (and statistical power), thus producing a large number of false positives, whatever the type  
432 and sample size of crossing schemes (Fig. 2). Two previous studies, using the same restricted  
433 maximum likelihood method, also warned about the overestimation of heritability estimates when  
434 maternal effects are not specified in the animal model (De Villemereuil, Gimenez & Doligez, 2013;  
435 Kruuk & Hadfield, 2007). In Kruuk and Hadfield (2007), the overestimation was large, as in our  
436 study, with a mean estimated  $h^2$  of 0.52 (bird system) or even 0.6 (ungulate system) for a simulated  $h^2$   
437 of 0.3 and  $m^2$  of 0.2. In comparison, Villemereuil et al. (2013) found smaller bias in  $h^2$  caused by  
438 maternal effect: for instance, they obtained a simulated  $h^2$  of 0.2 for a simulated  $h^2$  of 0.1 and  $m^2$  of  
439 0.45. This lower effect of maternal effect in the  $h^2$  estimates may be due low levels of  $m^2$  in their  
440 simulations (Villemereuil et al (2013)).

441

#### 442 *Performance of an informed model (Model 2)*

443 Since maternal effects lead to overestimate heritability in a naive model, under their suspicion, it  
444 seemed appropriate to consider an informed model (specifying maternal effects). With our  
445 experimental dataset,  $h^2$  estimates were shown to be little biased downward but, the power to detect a  
446 pedigree effect became null or very low (< 11%; Fig. 2). The low performance in  $h^2$  estimation was  
447 improved by an increased number of families (instead of a large number of offspring per female) and a  
448 number of dams by sire greater than a number of sires (Fig. 3). The former result is in agreement with  
449 theoretical formulae of sampling error and power of heritability estimates (Lynch & Walsh, 1998)  
450 whereas the latter is probably linked to the greater precision of estimation of the maternal effect with  
451 larger numbers of females per male. Villemereuil et al. (2013) showed that parent-offspring  
452 regression, restricted maximum likelihood (tested here), and Bayesian methods (both using an  
453 informed model) performed similarly in estimating heritability in the presence of a maternal effect.  
454 However, parent-offspring regression requires measurements of both parents and offspring and  
455 Bayesian method gives even more biased results with small sample size (De Villemereuil, Gimenez &  
456 Doligez, 2013).

457 Our simulations also showed that the informed model estimated maternal effects more precisely than  
458 the heritabilities. However, optimized crossing schemes (Fig S4, Appendix) or large sample sizes  
459 (about 400 offspring, Fig 5) are needed to detect maternal effects with sufficient power. Otherwise,  
460 LRT between nested models should be used with caution to decide whether maternal effects are  
461 significant and which model to use. With the Bayesian approach, Holand and Steinsland (2016)  
462 demonstrated that using the Deviance Information Criterion (DIC, a generalization of the Akaike  
463 Information Criterion) to compare naive and informed models also required a substantial maternal  
464 effect (equal to half the heritability), even with a very large sample size ( $N=1025$ ).

465

#### 466 *Some recommendations regarding models and designs*

467 When sample size or crossing scheme are practically constrained, our simulations confirmed that  
468 specifying the right animal model is crucial to have sufficient power and reliable estimates of pedigree  
469 and maternal effects: omitting a maternal effect in the statistical model generates overestimation of  
470 heritability and false positives whereas inappropriately specifying a maternal effect dramatically wipes  
471 out the power of analyses. Since maternal effect estimation is more accurate than pedigree effect  
472 estimation, we advise to first inform on the maternal effect using an informed model, and then decide,  
473 from the obtained  $P$ -values and estimate values, which model should be used. Note that comparing  
474 outputs of both statistical models may also provide an indication on the absence of a maternal effect,  
475 since in such a case, both models should give congruent  $h^2$  estimates. However, in the case where a  
476 maternal effect is estimated to be present, interpreting results must be done with caution since the  
477 power to detect a pedigree effect would remain low and the study might be inconclusive (see the  
478 summary guideline in Table 4). Furthermore, in the case where a maternal effect is estimated to be  
479 absent, the use of a naïve model might be done with a sub-optimal crossing scheme, as requirements  
480 of this model are opposite in relative numbers of dam by sires to sires and of offspring per family to  
481 family. Thus, without prior knowledge on the presence of a maternal effect, the best option to estimate  
482  $h^2$  might be to favor the greatest number of families and a balanced number of sires and dams by sires.

483

#### 484 *Use of pedigree-free methods*

485 Analyzing big datasets with strong relatedness structure, in order to get good detection power and  
486 accurate estimates of  $h^2$  and  $m^2$ , implies being able to rear a lot of individuals in private boxes (to  
487 identify them if they cannot be marked) and to manipulate a lot of mating pairs. Private boxes  
488 represent an obvious constraint on experimental designs: more individuals mean more effort in  
489 sampling, rearing and manipulations. In addition, creating lots of mating pairs can prove to be  
490 challenging, especially in species where successful mating is not straightforward, for example if  
491 sexual selection is strong. In addition, in the context of phase polyphenism, manipulating rearing  
492 density of locust would be a requirement to carry comprehensive quantitative genetics experiments.  
493 Rearing individuals in group cages would alleviate these limitations, both reducing constraints on

494 mating (increasing the number of families and the half-sib/full-sib structure) and allowing studying  
495 more individuals effortlessly. However, this removes the possibility to use a classical pedigree since  
496 mating pairs cannot be known exhaustively, calling for the use of pedigree-free methods.

497 Our results showed that, using a matrix of molecular pairwise relatedness computed at 16  
498 microsatellite markers might be sufficient to obtain reliable heritability estimates, despite slight  
499 decrease and downward bias in estimation precision in comparison with the use of a full pedigree.  
500 These results are more encouraging than those from most simulation studies in a context of natural  
501 populations (but see DiBattista, Feldheim, Garant, *et al.*, 2009) and are probably achieved thanks to (i)  
502 the initial strong relatedness structure in tested datasets (Csilléry, Johnson, Beraldi, *et al.*, 2006; Gay,  
503 Siol & Ronfort, 2013) and (ii) the high versatility of the microsatellite markers developed in the desert  
504 locust (i.e., mean expected heterozygosity of 0.84; see also Blondin, Badisco, Pagès, *et al.*, 2013). A  
505 drawback of this pedigree-free method is that it is not possible to estimate maternal effects since the  
506 identity of mothers are not known. The solution would be to genotype both offspring and parents and  
507 to use a parentage assignment method to reconstruct the entire pedigree which could be used  
508 afterwards in an animal model either naïve or informed for a maternal effect. Thus, we carried out  
509 additional simulations of 100 genotype datasets (still with 16 microsatellite markers), on the crossing  
510 scheme that mimicked our experimental design (CS3) and the large optimized crossing scheme  
511 (CS15). We showed that the R package **MasterBayes** (Hadfield, Richardson & Burke, 2006) allowed  
512 a perfect reconstitution of the original pedigree (i.e. 100% simulated datasets had 0 errors in the  
513 reconstructed pedigree). This high performance in pedigree reconstruction is explained by the high  
514 levels of information within the Orthopteran microsatellite markers and within the pedigree structures  
515 controlled under laboratory conditions (i.e. strong level of relatedness in a half-sib /full-sib design)  
516 along with the knowledge of all maternal genotypes (Wang, 2006; Blouin, 2003; Visscher, Hill &  
517 Wray, 2008).

518

#### 519 *Heritability and maternal effects in phase traits*

520 In order to get first insights into the transmission of phase traits, we measured body color, shape and  
521 size traits of late life stages (last-instar larvae and immature adults) of the desert locust under  
522 homogeneous conditions of isolation and main other environmental drivers (e.g. humidity, food given  
523 *ad libitum*). These measures were acquired under two controlled temperatures, one suboptimal (28°C)  
524 and one favoring fast growth (34°C). We used a half-sib/full-sib crossing scheme of 212 individuals  
525 maximizing numbers of offspring by family and of dams by sire. Previous studies showed that  
526 maternal effects affect the transmission of the F/C ratio, melanization and body weight of hatchlings in  
527 *Schistocerca gregaria* (Table 1). The main hypothesis explaining the proximal causes of these  
528 maternal effects involves a factor either controlling primary egg size (and thus the amount of yolk)  
529 which in turn influences hatchling size and color (Maeno & Tanaka, 2010; Maeno, Piou, Ould Babah,

530 *et al.*, 2013), or released in the egg foam and influencing offspring behavior (Simpson & Miller,  
531 2007).

532 Despite the statistical limitations of experimental dataset, we combined the simulation results  
533 to the experimental results to get some first insights into the transmission of phase traits in the desert  
534 locust. First, we showed that the informed model should allow relatively accurate estimates of  
535 maternal effect but with low probability ( $\leq 20\%$ ) of detecting a maternal effect of a low or moderate  
536 magnitude. Accordingly, we found that no trait exhibits a significant maternal effect ( $P$ -value  $\geq 0.11$ ).  
537 Since maternal variances were very low (thus  $m^2=0$ ) and additive variance estimates were strictly  
538 equal in the the naïve and informed models, we suggest that the transmission of E/F and O/V were not  
539 affected by maternal effect. Conversely, a maternal effect might affect body color ( $m^2$  estimates  $\sim 0.2$ )  
540 and possibly body size and F/C ( $m^2$  estimates  $\sim 0.1$ ). Note that these  $m^2$  estimates were in all cases (at  
541 most twice) lower than the  $h^2$  estimates from the naïve model.

542 The relatively low maternal effects estimated from our experimental dataset may be explained  
543 by the standardized rearing of the mothers in isolation condition. Doing so, we might both have  
544 equalized the maternal environment among our population and remove the main environmental source  
545 of maternal effect in the desert locust, i.e. crowding. In addition, maternal effects are expected to be  
546 larger for early offspring traits than for late traits (as the ones measured in this study) but can persist  
547 into adulthood (McAdam, Garant & Wilson, 2014). In locusts, whether maternal effects detected in  
548 hatchlings would persist in later stages is unknown but the colour of the hatchlings changed in the  
549 second stadium through the effect of lifetime rearing density from the first stadium (Tanaka & Maeno,  
550 2006). Therefore the maternal variance should be attributed mainly to genetic variation among  
551 mothers and to gene-by-environment interaction. For example, the morphometrical and behavioral  
552 phases were shown to be transmitted trans-generationally and the genetic variation in this response  
553 may indicate a parental effect mediated by parental genes (Chapuis, Estoup, Augé-Sabatier, *et al.*,  
554 2008).

555 We showed that it is not possible to conclude on heritability estimates with the informed  
556 model since power of heritability detection was mostly lower than 5%, whatever the actual heritability  
557 of traits. For traits displaying no maternal effect (E/F and O/V), heritability estimates obtained with  
558 the naïve model are more reliable even if the power is still limited for heritabilities under 0.3.  
559 Therefore E/F and O/V seem to not be (highly) heritable. When maternal effects are present, the naïve  
560 model does not allow reliable estimation of heritabilities. Concerning the four traits seemingly affected  
561 by maternal effect (green color, brightness, F and F/C), we cannot safely conclude on their level of  
562 heritability: the observed changes in heritability estimates between the naïve and the informed model  
563 could be explained either by a downward bias in  $h^2$  estimates in the informed model or by an  
564 overestimation of  $h^2$  in the naïve model in the presence of maternal effect, as shown by the  
565 simulations. Finally, since the maximal larval weight and F/V have heritability and maternal effect



566 estimates in the same order of magnitude, it is also not possible to draw conclusion about their  
567 transmission.

568 Overall, even if our experimental results are not fully conclusive, they might indicate that  
569 some phase traits are affected by maternal effects. To increase the probability of formally come to a  
570 conclusion on the transmission of phase traits, maternal effects and heritabilities estimates with  
571 significantly more power and more accuracy are required. We showed that this may be achieved by  
572 optimizing the crossing schemes and more importantly by increasing the sample size. To do so, the use  
573 of a pedigree-free method on the available set of microsatellite markers in the desert locust (Blondin et  
574 al. 2013), would be promising for future quantitative genetic studies on grouped individuals. Note that  
575 this approach requires measuring all traits of interest simultaneously, or at least within the same  
576 developmental stadium if individuals are tagged (since tags are lost during molt, Gangwere et al.  
577 1964), before animals are sacrificed for genotyping.

578

### 579 *Conclusion*

580 Our simulations showed that it is challenging to jointly estimate heritability and maternal effects  
581 because that it requires datasets with a large sample size and number of families. When it is not  
582 possible to get such adequate datasets, conclusions about the heritability of studied traits should  
583 remain very cautious and conservative. In any case, comparing the outcomes of both naive and  
584 informed models can give precious clues about the impact of maternal effects on heritability  
585 assessments. Finally, we want to stress out that 1) simulations are a powerful and convenient tool to  
586 explore the performances of potential experimental designs and/or to determine the reliability of  
587 obtained estimates and 2) pedigree-free methods may help to achieve satisfying experimental design  
588 while limiting the need for time and space.

589

### 590 **Acknowledgements**

591 We thank deeply M. Ould Babah Ebbe, director of the National Anti-Locust Center of Mauritania for  
592 providing the egg pods at the start of our experiment. We thank P.-E. Gay for assistance with figures  
593 S1 and S2.

594

### 595 **References**

- 596 Blondin, L., Badisco, L., Pagès, C., Foucart, A., et al. (2013) Characterization and comparison of  
597 microsatellite markers derived from genomic and expressed libraries for the desert locust.  
598 *Journal of Applied Entomology*. 137, 673–683.
- 599 Blouin, M.S. (2003) DNA-based methods for pedigree reconstruction and kinship analysis in natural  
600 populations. *Trends In Ecology & Evolution*. 18 (10), 503–511.
- 601 Bolker, B.M. (2008) *Ecological models and data in R*. Princeton University Press.
- 602 Botha, D.H. (1967) Some phase characteristics of the southern African form of the desert locust

- 603 (Schistocerca gregaria (Forsk.)). *S. Afr. J. Agric. Sci.* 1061–76.
- 604 Bouaïchi, A. & Simpson, S. (2003) Density-dependent accumulation of phase characteristics in a  
605 natural population of the desert locust *Schistocerca gregaria*. *Physiological entomology*. 25–31.
- 606 Butler, D., Cullis, B.R., Gilmour, A. & Gogel, B.J. (2007) *Analysis of mixed models for S language*  
607 *environments : ASReml-R reference manual*. (February).
- 608 Chapuis, A.M., Foucart, A., Plantamp, C., Blondin, L., et al. (2017) Genetic and Morphological  
609 Variation in Non-Polyphenic Southern African Populations of the Desert Locust. *African*  
610 *Entomology*. 25 (1), 13–23.
- 611 Chapuis, M.-P., Estoup, A., Augé-Sabatier, A., Foucart, A., et al. (2008) Genetic variation for parental  
612 effects on the propensity to gregarise in *Locusta migratoria*. *BMC evolutionary biology*. [Online]  
613 837.
- 614 Charmantier, A. & Garant, D. (2005) Environmental quality and evolutionary potential: lessons from  
615 wild populations. *Proceedings of the Royal Society B: Biological Sciences*. 272 (1571), 1415–  
616 1425.
- 617 Csilléry, K., Johnson, T., Beraldi, D., Clutton-Brock, T., et al. (2006) Performance of marker-based  
618 relatedness estimators in natural populations of outbred vertebrates. *Genetics*. 173 (4), 2091–  
619 2101.
- 620 Danchin, É., Charmantier, A., Champagne, F. A., Mesoudi, A., et al. (2011) Beyond DNA: integrating  
621 inclusive inheritance into an extended theory of evolution. *Nature reviews. Genetics*. 12 (7),  
622 475–486. DiBattista, J.D., Feldheim, K.A., Garant, D., Gruber, S.H., et al. (2009) Evolutionary  
623 potential of a large marine vertebrate: Quantitative genetic parameters in a wild population.  
624 *Evolution*. 63 (4), 1051–1067. Dirsh, V.M. (1953) Morphometrical studies on phases of the  
625 desert locust (*Schistocerca gregaria* Forskal). *Anti-Locust Bull.* 16 pp.1–34. Gangwere, S.K.,  
626 Chavin, W. & Evans, F.C. (1964) Methods of marking insects, with especial reference to  
627 Orthoptera (Sens. Lat.). *Annals of the Entomological Society of America*. 57 (6), 662–669.
- 628 Gay, L., Siol, M. & Ronfort, J. (2013) Pedigree-free estimates of heritability in the wild: promising  
629 prospects for selfing populations. *PloS one*. 8 (6), e66983. Hadfield, J.D. (2010) MCMC methods  
630 for multi-response generalized linear mixed models: The MCMCglmm R package. *Journal of*  
631 *Statistical Software*. 33 (2), 1–22.
- 632 Hadfield, J.D., Richardson, D.S. & Burke, T. (2006) Towards unbiased parentage assignment:  
633 Combining genetic, behavioural and spatial data in a Bayesian framework. *Molecular Ecology*.  
634 15 (12), 3715–3730. Holand, A.M. & Steinsland, I. (2016) Is my study system good enough? A  
635 case study for identifying maternal effects. *Ecology and Evolution*. (7491), 1–10.
- 636 Houle, D. (1992) Comparing evolvability and variability of quantitative traits. *Genetics*. 130 (1), 195–  
637 204. Hunter-Jones, P. (1958) Laboratory studies on the inheritance of phase characters in locusts.  
638 *Anti-Locust Bull.* (29).
- 639 Kaatz, H.-H., Ferenz, H.-J., Langer, B. & Moritz, R.F.A. (2007) Isolation and characterization of nine

- 640 polymorphic microsatellite loci from the desert locust, *Schistocerca gregaria*. *Molecular Ecology*  
641 *Notes*. 7 (6), 1042–1044.
- 642 Kirkpatrick, M. & Lande, R. (1989) The evolution of maternal characters. *Evolution*. 43 (3), 485–503.
- 643 Kruuk, L.E.B. & Hadfield, J.D. (2007) How to separate genetic and environmental causes of similarity  
644 between relatives. *Journal of Evolutionary Biology*. 20 (5), 1890–1903.
- 645 Loiselle, B.A., Sork, V.L., Nason, J. & Graham, C. (1995) Spatial genetic structure of a tropical  
646 understory shrub, *Psychotria officinalis* (Rubiaceae). *American Journal of Botany*. 82 (11),  
647 1420–1425.
- 648 Lynch, M. & Walsh, B. (1998) *Genetics and analysis of quantitative traits*. Sinauer Sunderland, MA.
- 649 Maeno, K., Gotoh, T. & Tanaka, S. (2004) Phase-related morphological changes induced by [His7]-  
650 corazonin in two species of locusts, *Schistocerca gregaria* and *Locusta migratoria* (Orthoptera:  
651 Acrididae). *Bull Entomol Res*. 94 (4), 349–357. Maeno, K. & Tanaka, S. (2010) Genetic and  
652 hormonal control of melanization in reddish-brown and albino mutants in the desert locust  
653 *Schistocerca gregaria*. *Physiological Entomology*. 35 (1), 2–8.
- 654 Maeno, K. & Tanaka, S. (2009) Is juvenile hormone involved in the maternal regulation of egg size  
655 and progeny characteristics in the desert locust? *Journal of insect physiology*. 55 (11), 1021–  
656 1028. Maeno, K.O., Piou, C., Ould Babah, M.A. & Nakamura, S. (2013) Eggs and hatchlings  
657 variations in desert locusts: Phase related characteristics and starvation tolerance. *Frontiers in*  
658 *Physiology*. 41–10.
- 659 McAdam, A.G., Garant, D. & Wilson, A.J. (2014) The effects of other' genes: maternal and other  
660 indirect genetic effects. In: *Quantitative genetics in the wild*. Oxford University Press. pp. 84–  
661 103.
- 662 Morrissey, M.B. & Wilson, A.J. (2010) pedantics: an r package for pedigree-based genetic simulation  
663 and pedigree manipulation, characterization and viewing. *Molecular Ecology Resources*. 10 (4),  
664 711–719.
- 665 Morrissey, M.B., Wilson, A.J., Pemberton, J.M. & Ferguson, M.M. (2007) A framework for power  
666 and sensitivity analyses for quantitative genetic studies of natural populations, and case studies in  
667 Soay sheep (*Ovis aries*). *Journal of Evolutionary Biology*. 20 (6), 2309–2321. Mousseau, T. a &  
668 Roff, D. a (1987) Natural selection and the heritability of fitness components. *Heredity*. 59181–  
669 197. Nickerson, B. & others (1956) Pigmentation of Hoppers of the Desert Looust (*Schistocerca*  
670 *gregaria* Forsk) in Relation to Phase Coloration. *Anti-Locust Bulletin*. 241–34.
- 671 Nolte, D.J. (1966) Strain crosses in the desert locust. In: *Proceedings of the Third Congress of the*  
672 *South African Genetics Society*. pp. 17–22.
- 673 Nolte, D.J. (1965) The pigmentation of locusts. *South African Journal of Science*. 61 (4), 173–178.
- 674 Pelissié, B., Piou, C., Jourdan-Pineau, H., Pagès, C., et al. (2016) Extra molting and selection on  
675 larval growth in the desert locust. *PLoS ONE*. 1–18.
- 676 Pener, M.P. & Simpson, S.J. (2009) Locust Phase Polyphenism : An Update. *Advances in insect*

- 677 *physiology*. 361–272.
- 678 Räsänen, K. & Kruuk, L.E.B. (2007) Maternal effects and evolution at ecological time-scales.  
679 *Functional Ecology*. 21 (3), 408–421. Roser, L., Vilardi, J., Saidman, B. & Ferreyra, L. (2015)  
680 *Package ‘EcoGenetics’*.
- 681 Schmidt, G.H. & Albüzt, R. (1996) Cross-breeding of two subspecies of *Locusta migratoria* (L.) and  
682 analysis of numerical character variations in various geographical populations. *Boll. Lab.*  
683 *Entomol. Agraria--Portici Filippo Silvestri*. 5213–26.
- 684 Seidelmann, K. & Ferenz, H.J. (2002) Courtship inhibition pheromone in desert locusts, *Schistocerca*  
685 *gregaria*. *Journal of Insect Physiology*. 48 (11), 991–996. Simpson, S.J. & Miller, G.A. (2007)  
686 Maternal effects on phase characteristics in the desert locust, *Schistocerca gregaria*: a review of  
687 current understanding. *Journal of insect physiology*. 53 (9), 869–876. Stower, W.J., Davies, D.E.  
688 & Jones, I.B. (1960) Morphometric studies of the desert locust, *Schistocerca gregaria* (Forsk.).  
689 *Journal of Animal Ecology*. 29 (2), 309–339.
- 690 Sword, G.A., Lecoq, M. & Simpson, S.J. (2010) Phase polyphenism and preventative locust  
691 management. *Journal of insect physiology*. 56 (8), 949–957. Tanaka, S. & Maeno, K. (2006)  
692 Phase-related body-color polyphenism in hatchlings of the desert locust, *Schistocerca gregaria*:  
693 re-examination of the maternal and crowding effects. *Journal of insect physiology*. 52 (10),  
694 1054–1061. Uvarov, B. (1966) *Grasshoppers and locusts. A handbook of general acridology*.  
695 Cambridge University Press (ed.).
- 696 De Villemereuil, P., Gimenez, O. & Doligez, B. (2013) Comparing parent-offspring regression with  
697 frequentist and Bayesian animal models to estimate heritability in wild populations: A simulation  
698 study for Gaussian and binary traits. *Methods in Ecology and Evolution*. 4260–275.
- 699 Visscher, P.M., Hill, W.G. & Wray, N.R. (2008) Heritability in the genomics era — concepts and  
700 misconceptions. *Nature Reviews Genetics*. 9 (4), 255–266. Wang, J. (2006) Informativeness of  
701 genetic markers for pairwise relationship and relatedness inference. *Theoretical Population*  
702 *Biology*. 70 (3), 300–321.
- 703 Wilson, A.J., Coltman, D.W., Pemberton, J.M., Overall, A.D.J., et al. (2005) Maternal genetic effects  
704 set the potential for evolution in a free-living vertebrate population. *Journal of Evolutionary*  
705 *Biology*. 18 (2), 405–414.
- 706 Wilson, A.J., Réale, D., Clements, M.N., Morrissey, M.M., et al. (2010) An ecologist’s guide to the  
707 animal model. *The Journal of animal ecology*. 79 (1), 13–26. Yassin, Y.A., Heist, E.J. &  
708 Ibrahim, K.M. (2006) PCR primers for polymorphic microsatellite loci in the desert locust,  
709 *Schistocerca gregaria* (Orthoptera: Acrididae). *Molecular Ecology Notes*. 6 (3), 784–786.
- 710 Yerushalmi, Y., Tauber, E. & Pener, M.P. (2001) Phase polymorphism in *Locusta migratoria*: the  
711 relative effects of geographical strains and albinism on morphometrics. *Physiological*  
712 *Entomology*. 26 (2), 95–105.
- 713

714 **Table 1:** Literature-based evidence for environmental lifetime and parental effects on the phase traits measured in this study.

| Category of phase traits ( <i>main recognized function</i> )                                 | Mediated by                     | Lifetime phenotypic plasticity                                                                           | Parental effect (on early stage)                   |
|----------------------------------------------------------------------------------------------|---------------------------------|----------------------------------------------------------------------------------------------------------|----------------------------------------------------|
| Black pigmentation ( <i>disease resistance</i> <sup>28,29</sup> , <i>migration ability</i> ) | Density (gregarious)            | more black marks <sup>9,19,21</sup>                                                                      | more black marks <sup>1,9,10,11,14,15,17, 20</sup> |
|                                                                                              | Temperature (high)              | less black marks <sup>8,20</sup>                                                                         | more black marks <sup>8</sup>                      |
|                                                                                              | Humidity                        | NA                                                                                                       | NA                                                 |
|                                                                                              | Food ( <i>Dipterygium g.</i> )  | NA                                                                                                       | less black marks <sup>12</sup>                     |
| Green-brown pigmentation ( <i>warning, predation resistance</i> <sup>4,5,24</sup> )          | Infection                       | more black marks <sup>29</sup>                                                                           | more black marks <sup>8</sup>                      |
|                                                                                              | Density (gregarious)            | lower green coloration <sup>19,20</sup>                                                                  | NA                                                 |
|                                                                                              | Temperature (high)              | brighter green coloration <sup>13,25</sup>                                                               | brighter green coloration <sup>13</sup>            |
|                                                                                              | Humidity under isolation (high) | brighter green coloration <sup>25</sup>                                                                  | NA                                                 |
| Body shape ( <i>migration ability, brain neuronal integration</i> <sup>22</sup> )            | Food                            | NA                                                                                                       | NA                                                 |
|                                                                                              | Density (gregarious)            | larger E/F and smaller F/C, F/V, O/V <sup>6,26,27</sup> (i.e., longer wings, larger heads, smaller eyes) | smaller F/C <sup>1,3,15</sup>                      |
|                                                                                              | Temperature (high)              | larger E/F and F/C <sup>7,26</sup>                                                                       | NA                                                 |
|                                                                                              | Humidity (low)                  | larger E/F and smaller F/C <sup>7,26*</sup>                                                              | NA                                                 |
| Body size ( <i>investment to reproduction</i> <sup>2</sup> )                                 | Food (low quality)              | larger E/F and smaller F/C <sup>16,18</sup>                                                              | NA                                                 |
|                                                                                              | Density (gregarious)            | smaller size in ♀ <sup>6</sup>                                                                           | larger size <sup>14</sup>                          |
|                                                                                              | Temperature (high)              | larger size <sup>23</sup>                                                                                | NA                                                 |
|                                                                                              | Humidity                        | NA                                                                                                       | NA                                                 |
|                                                                                              | Food (low quality)              | smaller size <sup>16</sup>                                                                               | smaller size <sup>16</sup>                         |

715 1–910

716 11–1718

717 19–29

718 Note that there are interaction terms between temperature and humidity. The directional changes shown here are valid for an intermediate temperature only (30°C). In our  
719 study, all phase traits were measured in late stages, while parental influences summarized here concern early stages. NA: no data, controversial data or no effect. 1.Bouaïchi,  
720 A. & Simpson, S. (2003). 2.Chapuis, M.-P. *et al.* (2010). 3.Chapuis, M.-P. *et al.* (2008). 4.Dirsh, V. M. (1953). 5.Dudley, B. (1964). 6.Elliot, S. L., Blanford, S., Horton, C.  
721 M. & Thomas, M. B. (2003). 7.Hunter-Jones, P. (1958). 8.Islam, M. S., Roessingh, P., Simpson, S. J. & McCaffery, a R. (1994). 9.Saiful Islam, M., Roessingh, P., Simpson,  
722 S. J. & McCaffery, A. R. (1994). 10.Despland, E. & Simpson, S. J. (2005). 11.Leo Lester, R., Grach, C., Paul Pene, M. & Simpson, S. J. (2005). 12.Maeno, K. & Tanaka, S.  
723 (2010). 13.Maeno, K. & Tanaka, S. (2009). 14.Nolte, D. J. (1965). 15.Pelissié, B. *et al.* (2016). 16.Sword, G. a, Simpson, S. J., El Hadi, O. T. & Wilps, H. (2000). 17.  
724 McCaffery, A. R., Simpson, S. J., Islam, M. S. & Roessingh, P. (1998). 18.Stower, W. J., Davies, D. E. & Jones, I. B. (1960). 19.Despland, E. & Simpson, S. J. (2005).  
725 20.Jackson, G. J., Popov, G. B., Ibrahim, A. O. & others. (1978). 21.Maeno, K. & Tanaka, S. (2011). 22.Manchanda, S. K., Sachan, G. C. & Rathore, Y. S. (1980).  
726 23.Nickerson, B. & others. (1956). 24.Ott, S. R. & Rogers, S. M. (2010). 25.Nolte, D. J. (1962). 26.Stower, W. J. (1959). 27. Uvarov, B. P. & Hamilton, A. G. (1936).  
727 28.Wilson, K. *et al.* (2002). 29.Wilson, K., Cotter, S. C., Reeson, A. F. & Pell, J. K. (2001).  
728

729 **Table 2:** Estimated genetic parameters for morphological and colour traits of the desert locust estimated from a model including either pedigree only (model  
730 1) or pedigree and mother (model 2) as random effects. We used the whole experimental dataset and the real pedigree. We presented values for  
731 phenotypic mean and variance (computed on raw data), additive genetic variance ( $V_A$ ), variance associated with maternal identity ( $V_M$ ) and residual  
732 variance ( $V_R$ ), heritability ( $h^2$ ), maternal effect ( $m^2$ ) and their standard errors (SE), p-values of the pedigree effect and maternal effect. *Brightness*:  
733 Level of brightness, which is inversely related to the level of black pigmentation; *%Green*: Percentage of green color; *E*: Length of the fore wing; *F*:  
734 Length of the hind femur; *C*: Maximum width of the head; *H*: Height of the pronotum; *P*: Length of the pronotum; *O*: Vertical diameter of eyes; *V*: the  
735 width of the vertex between eyes.

| Trait             | Mean   | Variance | Model 1 with pedigree |          |       |             |                    | Model 2 with pedigree and mother |          |          |       |             |                    |       |              |                  |
|-------------------|--------|----------|-----------------------|----------|-------|-------------|--------------------|----------------------------------|----------|----------|-------|-------------|--------------------|-------|--------------|------------------|
|                   |        |          | $V_A$                 | $V_R$    | $h^2$ | SE( $h^2$ ) | p-value (pedigree) | $V_A$                            | $V_M$    | $V_R$    | $h^2$ | SE( $h^2$ ) | p-value (pedigree) | $m^2$ | SE ( $m^2$ ) | p-value (mother) |
| %Green            | 0.442  | 1.29E-03 | 1.03E-03              | 4.20E-04 | 0.71  | 0.28        | 0.00               | 1.45E-09                         | 3.32E-04 | 9.06E-04 | 0.00  | 0.00        | 1.00               | 0.27  | 0.12         | 0.11             |
| 1/Brightness      | 0.008  | 1.85E-06 | 6.74E-07              | 1.12E-06 | 0.38  | 0.21        | 0.00               | 2.28E-12                         | 2.88E-07 | 1.42E-06 | 0.00  | 0.00        | 1.00               | 0.17  | 0.09         | 0.24             |
| E/F               | 2.041  | 5.41E-03 | 2.00E-04              | 4.62E-03 | 0.04  | 0.08        | 0.53               | 2.00E-04                         | 2.54E-09 | 4.62E-03 | 0.04  | 0.08        | 0.70               | 0.00  | 0.00         | 1.00             |
| F/C               | 3.869  | 4.55E-02 | 8.07E-03              | 3.56E-02 | 0.18  | 0.14        | 0.04               | 6.26E-08                         | 2.90E-03 | 3.91E-02 | 0.00  | 0.00        | 1.00               | 0.07  | 0.05         | 0.13             |
| F/V               | 14.104 | 3.18E+00 | 1.90E-01              | 2.65E+00 | 0.07  | 0.09        | 0.15               | 1.46E-02                         | 9.98E-02 | 2.72E+00 | 0.01  | 0.17        | 0.98               | 0.04  | 0.09         | 0.72             |
| O/V               | 2.100  | 8.46E-02 | 2.70E-03              | 6.75E-02 | 0.04  | 0.06        | 0.39               | 2.70E-03                         | 5.55E-09 | 6.75E-02 | 0.04  | 0.06        | 0.80               | 0.00  | 0.00         | 1.00             |
| F                 | 3.393  | 1.34E-02 | 2.57E-03              | 9.84E-03 | 0.21  | 0.14        | 0.01               | 1.76E-08                         | 1.03E-03 | 1.10E-02 | 0.00  | 0.00        | 1.00               | 0.09  | 0.06         | 0.30             |
| Max larval weight | 1.708  | 2.15E-01 | 1.39E-02              | 1.73E-02 | 0.45  | 0.20        | 0.00               | 4.12E-03                         | 3.62E-03 | 2.20E-02 | 0.14  | 0.46        | 0.78               | 0.12  | 0.20         | 0.63             |

736

737 **Table 3:** Estimated genetic parameters for morphological and colour traits, estimated from either the real pedigree or molecular relatedness computed  
738 from 16 microsatellite markers. We used a subset of the experimental dataset constituted of 57 larvae and 96 adults, all reared at 34°C, and a  
739 statistical model including pedigree only as random effect (Model 1 in text). The fixed effects were sex \* extramolting for all traits. We presented  
740 values for phenotypic mean and variance (computed on raw data), additive variance ( $V_A$ ), residual variance ( $V_R$ ), heritability ( $h^2$ ), its standard error  
741 (SE( $h^2$ )), and p-value associated with the pedigree effect. *Brightness*: Level of brightness, which is inversely related to the level of black  
742 pigmentation; *%Green*: Percentage of green color; *E*: Length of the fore wing; *F*: Length of the hind femur; *C*: Maximum width of the head; *H*:  
743 Height of the pronotum; *P*: Length of the pronotum; *O*: Vertical diameter of eyes; *V*: the width of the vertex between eyes.

| Traits            | Mean    | Variance | Pedigree-based animal model |          |       |             |                    | Marker-based animal model |          |       |             |                    |
|-------------------|---------|----------|-----------------------------|----------|-------|-------------|--------------------|---------------------------|----------|-------|-------------|--------------------|
|                   |         |          | $V_A$                       | $V_R$    | $h^2$ | SE( $h^2$ ) | p-value (pedigree) | $V_A$                     | $V_R$    | $h^2$ | SE( $h^2$ ) | p-value (pedigree) |
| %Green            | 0.443   | 3.07E+02 | 1.77E-05                    | 1.14E-03 | 0.02  | 0.19        | 0.90               | 8.64E-05                  | 1.07E-03 | 0.07  | 0.27        | 0.64               |
| 1/Brightness      | 131.327 | 4.59E+02 | 4.81E-07                    | 8.78E-07 | 0.35  | 0.32        | 0.03               | 4.87E-07                  | 7.83E-07 | 0.38  | 0.37        | 0.04               |
| EF                | 2.061   | 5.26E-03 | 6.41E-10                    | 4.85E-03 | 0.00  | 0.00        | 1.00               | 5.70E-04                  | 4.28E-03 | 0.12  | 0.23        | 0.41               |
| FC                | 3.888   | 4.01E-02 | 1.76E-03                    | 3.91E-02 | 0.04  | 0.13        | 0.58               | 4.53E-03                  | 3.61E-02 | 0.11  | 0.22        | 0.37               |
| FV                | 14.721  | 2.57E+00 | 2.58E-07                    | 2.55E+00 | 0.00  | 0.00        | 1.00               | 2.58E-07                  | 2.55E+00 | 0.00  | 0.00        | 1.00               |
| OV                | 2.203   | 7.17E-02 | 6.26E-09                    | 6.19E-02 | 0.00  | 0.00        | 1.00               | 9.90E-08                  | 6.19E-02 | 0.00  | 0.00        | 1.00               |
| F                 | 3.405   | 1.39E-02 | 1.47E-03                    | 1.26E-02 | 0.10  | 0.18        | 0.41               | 2.22E-03                  | 1.16E-02 | 0.16  | 0.22        | 0.18               |
| Max larval weight | 1.650   | 2.29E-01 | 7.26E-03                    | 2.48E-02 | 0.23  | 0.24        | 0.13               | 1.95E-03                  | 2.88E-02 | 0.06  | 0.25        | 0.79               |

744

745 **Figure 1:** Performance of heritability estimates evaluated from simulation datasets based on our experimental design. We show mean estimate ( $h^2$ )  
 746 and 95% confidence interval (empty circles and grey area, respectively), root mean square error (RMSE) (black squares) and percentage of  
 747 simulations with significant pedigree effect (crosses) (y-axis) as a function of simulated  $h^2$  (x-axis) and maternal effects (horizontal panels) . We used  
 748 either Model 1 (without specified maternal effect, top panels) or Model 2 (specifying a maternal effect, bottom panels).

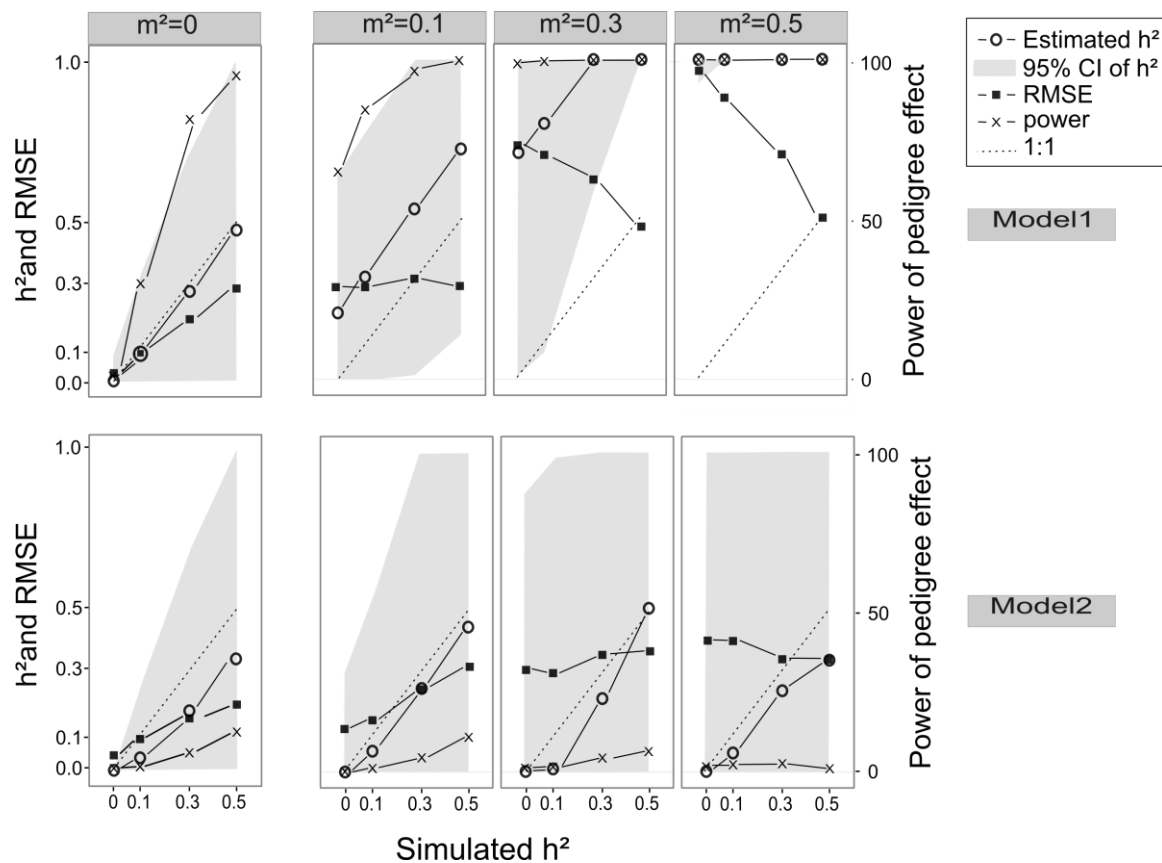

749

750



751 **Figure 2:** Performance of maternal effects estimation evaluated from simulation datasets based on our experimental design. We show mean estimates  
 752 ( $m^2$ ) and 95% confidence intervals (empty circles and grey area, respectively), root mean square error (RMSE) (black squares) and percentage of  
 753 simulations with significant maternal effect (crosses) as a function of simulated  $m^2$  (x-axis) and simulated  $h^2$  (panels). Estimates were obtained with  
 754 Model 2.

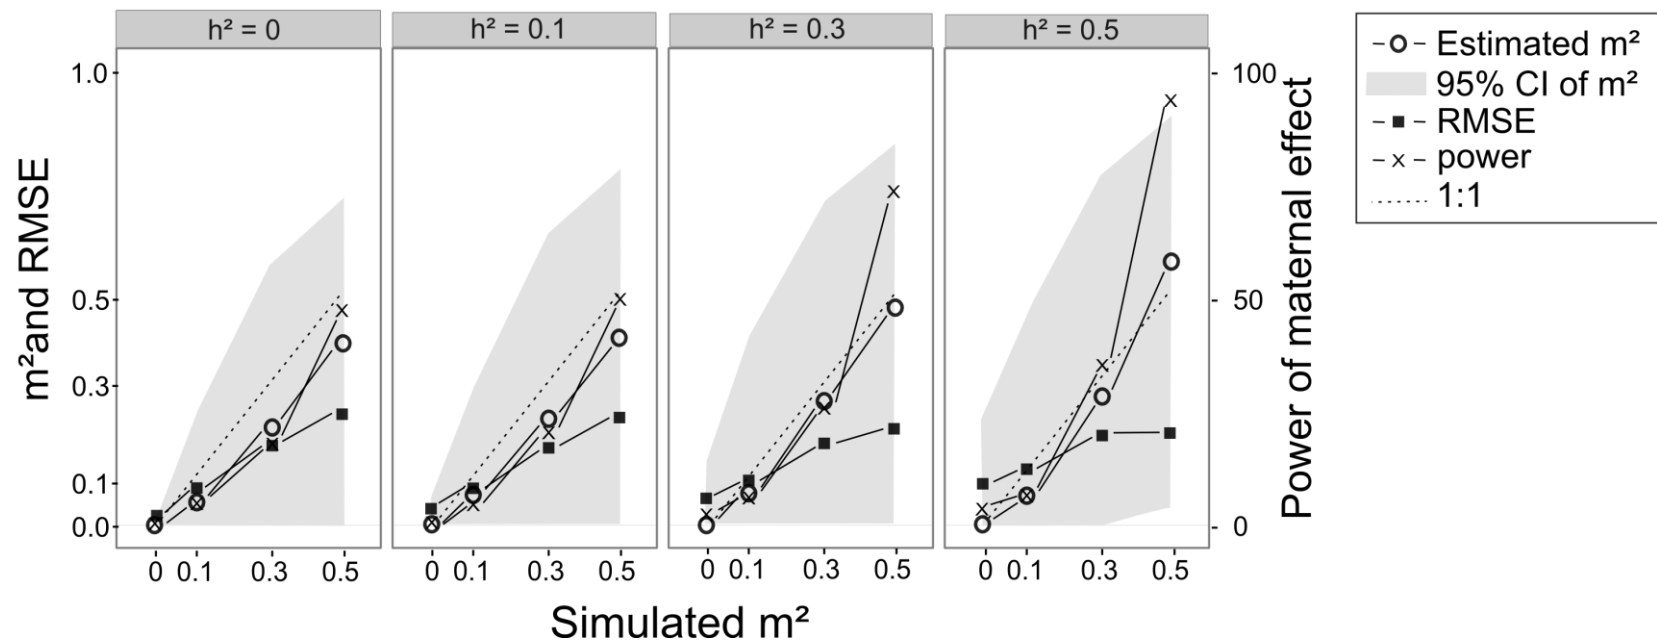

755

756

757

758 **Figure 3:** Effects on performance of  $h^2$  and  $m^2$  estimation of (a) the relative number of sires and dams by sire (larger:  $D:S < 1$  or smaller:  $D:S > 1$ ) and  
 759 (b) the number of offspring per family for a given total sample size. We plotted the mean RMSE (top) and the mean power to detect  $h^2$  and  $m^2$  effects  
 760 (bottom), both calculated over all values of  $h^2$  or  $m^2$ , in relation with animal model (indicated above each panel) and absence or presence of maternal  
 761 effect (indicated at the bottom of the graphs). 2, 4, 8, 13 and 26 are the numbers of offspring per family. \* denotes a significant effect within a block.

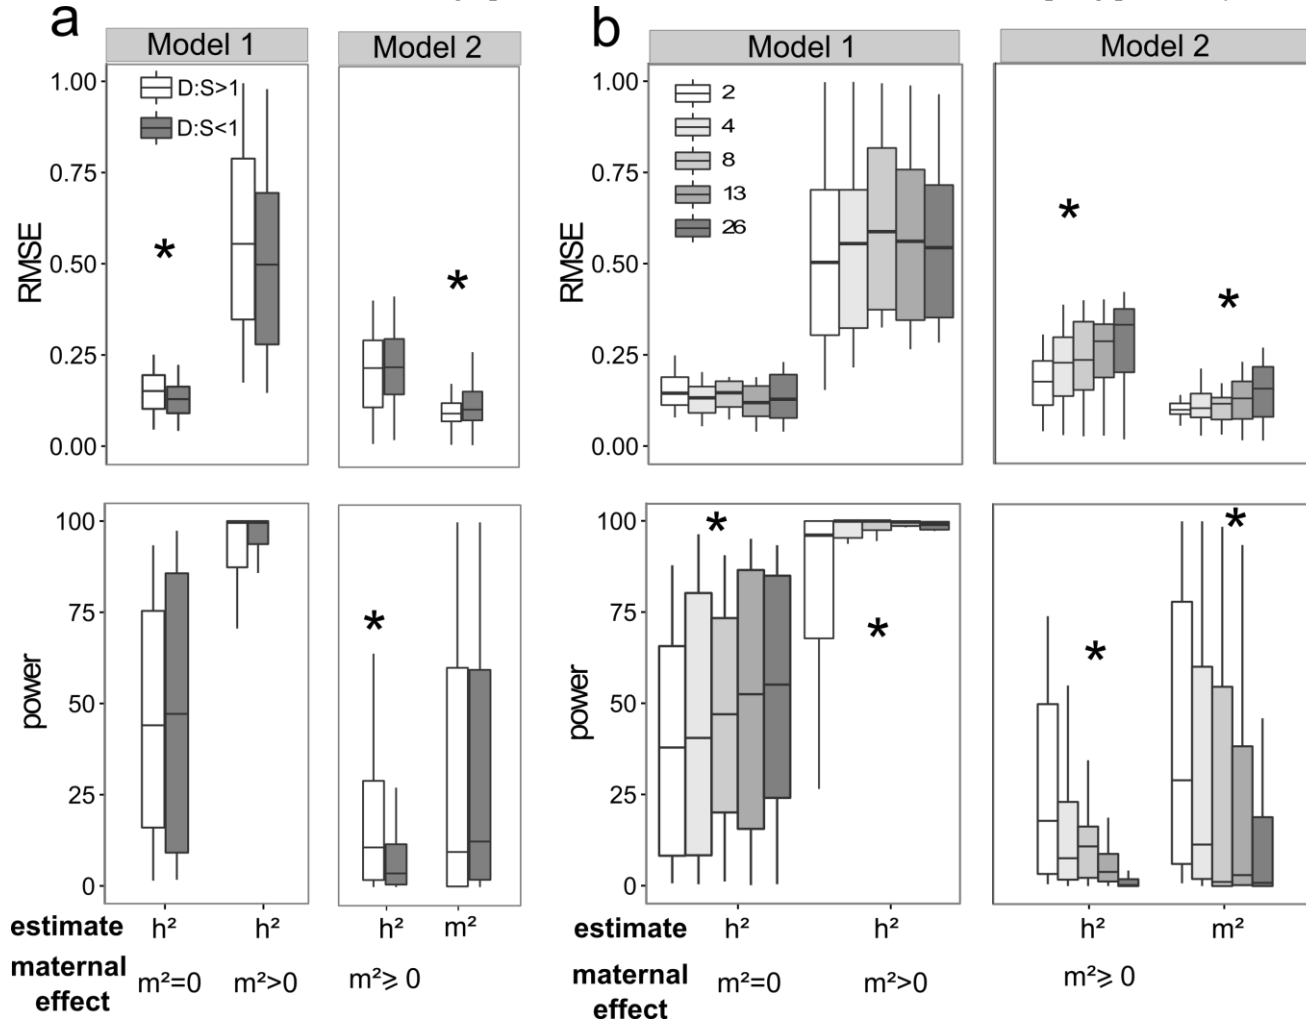

763 **Figure 4:** Performance of heritability estimation evaluated from simulation datasets on the best crossing scheme (CS15, 416 measured offspring). We  
 764 show mean estimate ( $h^2$ ) and 95% confidence interval (empty circles and grey area, respectively), root mean square error (RMSE) (black squares) and  
 765 percentage of simulations with significant pedigree effect (crosses) (y-axis) as a function of simulated  $h^2$  (x-axis) and maternal effects (horizontal  
 766 panels) We used either Model 1 (without specified maternal effect, top panels) or Model 2 (specifying a maternal effect, bottom panels).

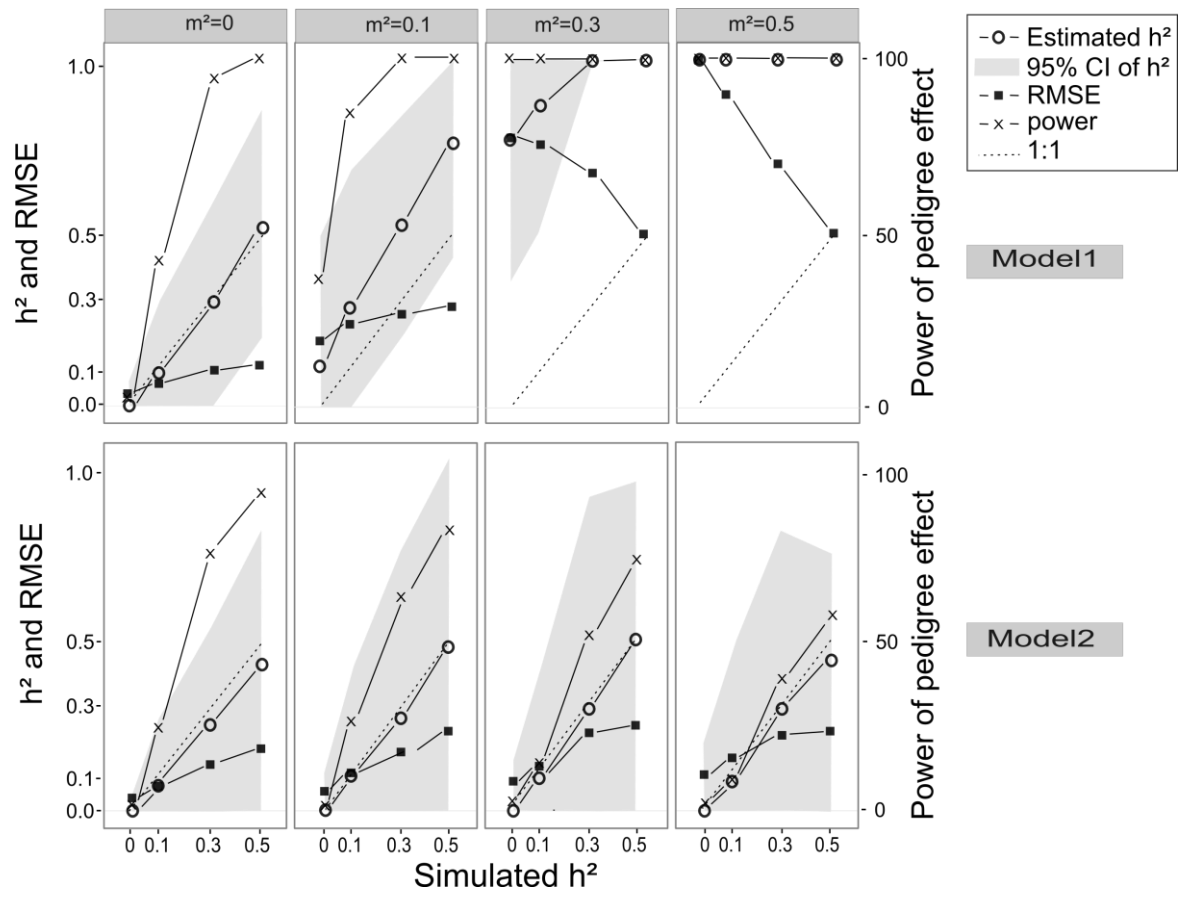

767

768

769 **Figure 5:** Performance of maternal effects estimation evaluated from simulation datasets on the best crossing scheme (CS15, 416 measured  
 770 offspring). We show mean estimates ( $m^2$ ) and 95% confidence intervals (empty circles and grey area, respectively), root mean square error (RMSE)  
 771 (black squares) and percentage of simulations with significant maternal effect (crosses) as a function of simulated  $m^2$  (x-axis) and simulated  $h^2$   
 772 (panels). Estimates were obtained with Model 2.

773

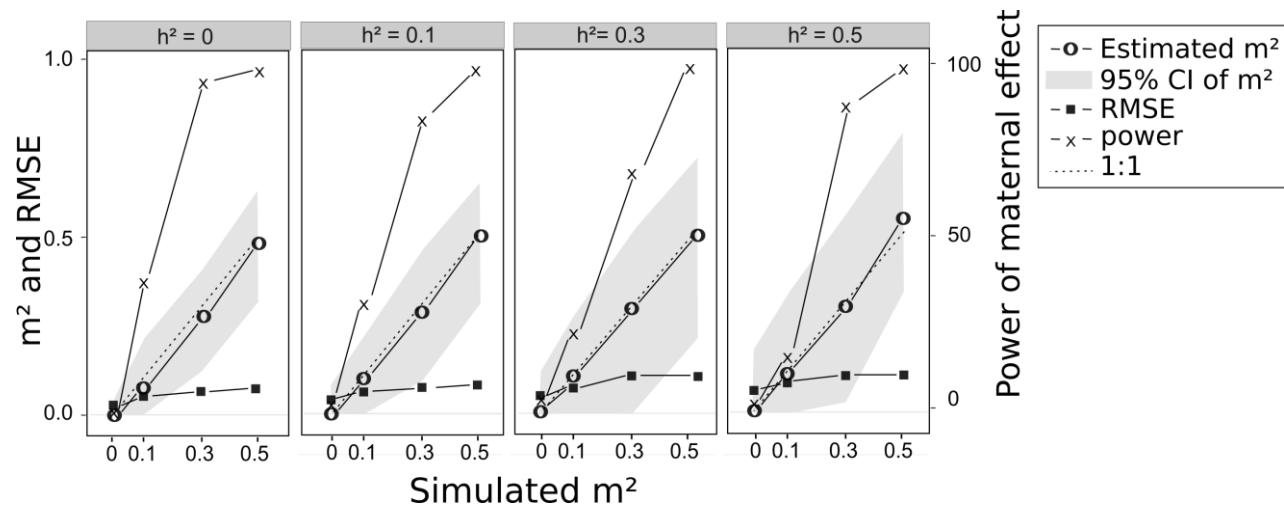

774 **Figure 6:** Performance of heritability estimation evaluated from simulation datasets on marker-based pedigree free method. We analyzed two  
775 different numbers of microsatellite markers (16 or 29), and the pedigree method is also shown as a reference. Simulations were performed on two  
776 designs: the best simulated design (CS15, 416 measured offspring) and our experimental design. Performance was evaluated by the root mean square  
777 error (RMSE) (squares and solid lines) and the power to detect a pedigree effect (crosses and dashed lines).

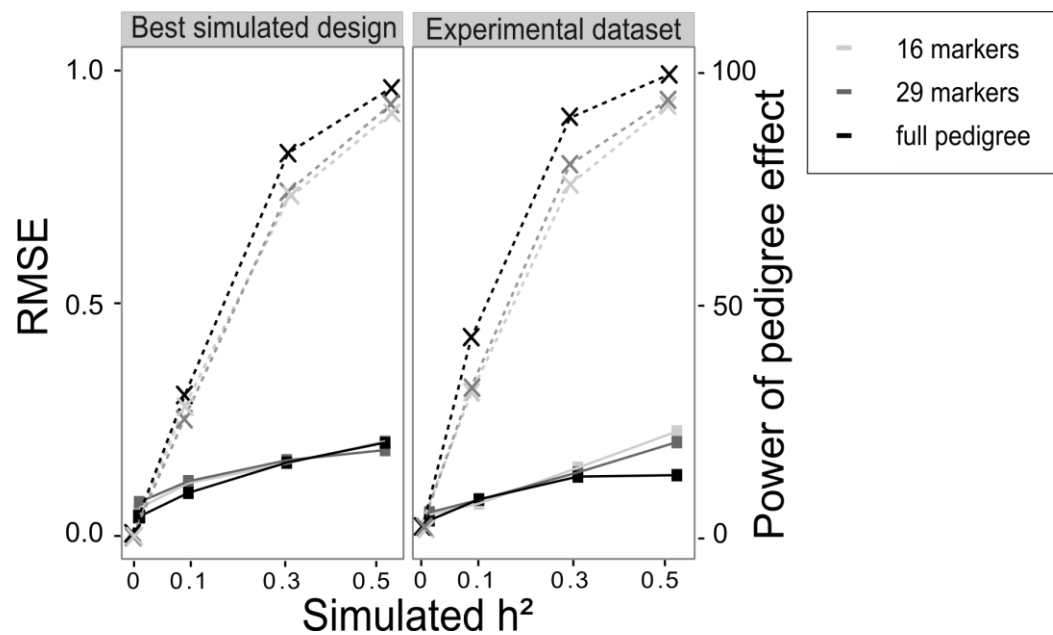

778

779

780

781
